# Supplementary material for: Mitochondrial aerobic respiration is activated during hair follicle stem cell differentiation, and its dysfunction retards hair regeneration
Source: PubMed Central journal article supplement (PMC4860312; doi:10.7717/peerj.1821), 2016-05-03

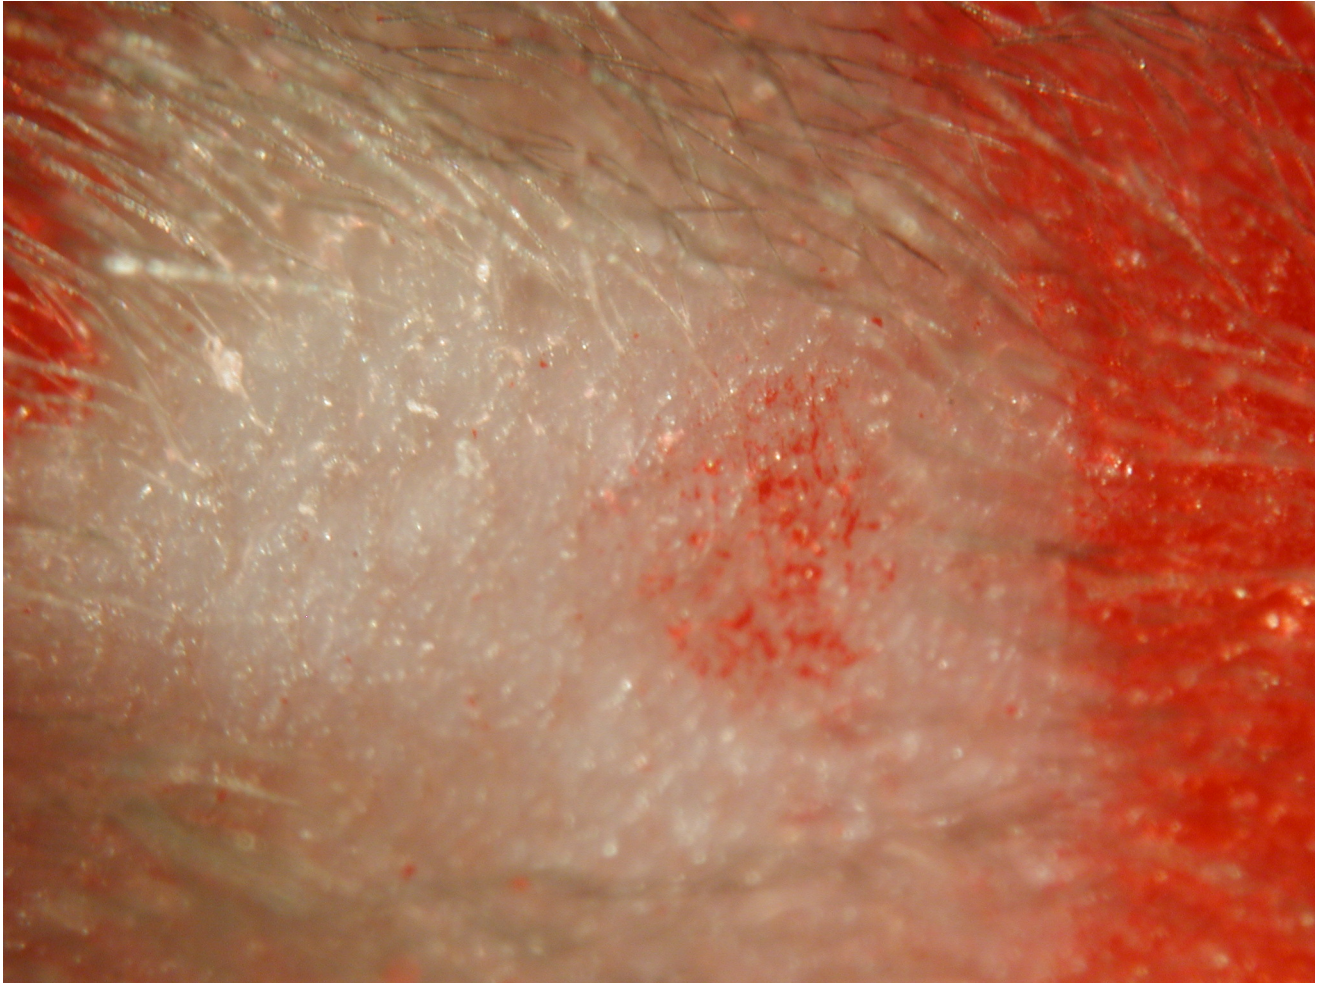

Supplement: peerj-04-1821-s005.pdf [file peerj-04-1821-s005.pdf]
