# Supplementary figures and images for: Mitochondrial aerobic respiration is activated during hair follicle stem cell differentiation, and its dysfunction retards hair regeneration
Source: PeerJ journal article supplement (doi:10.7717/peerj.1821), 2016-05-03

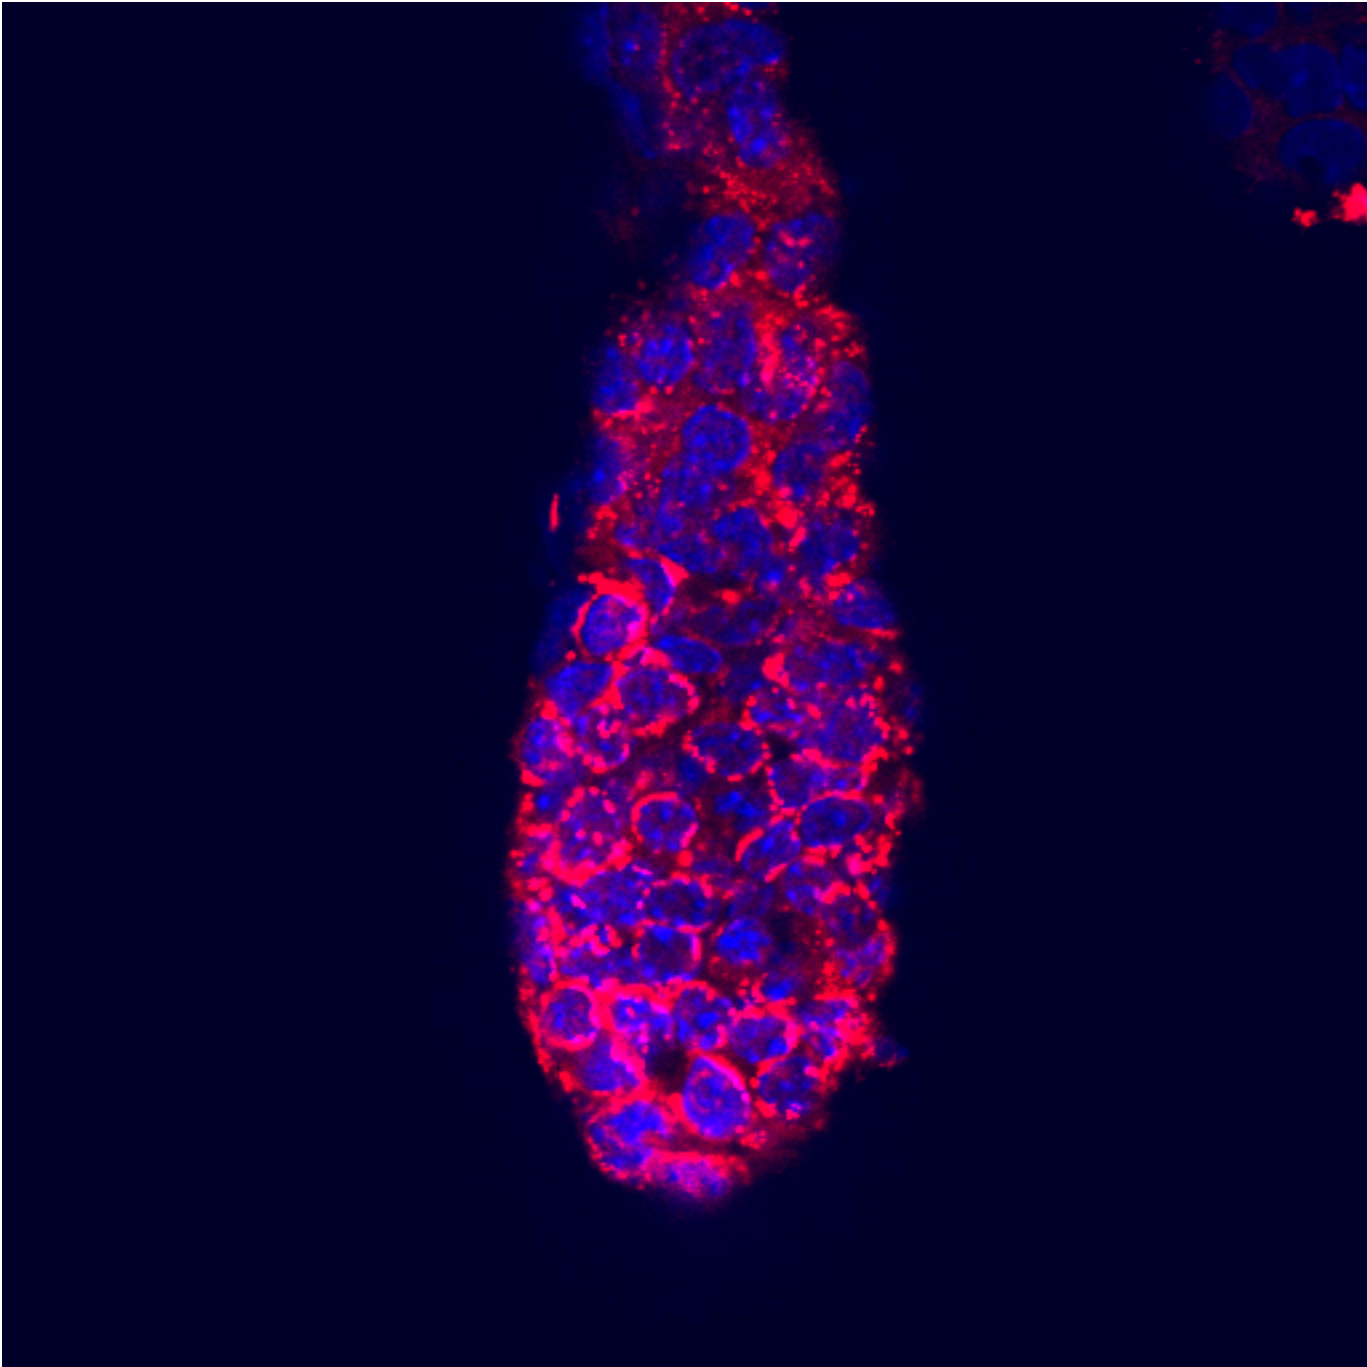

Supplement: Raw_data_or_figure_2.zip [file Raw_data_or_figure_2.zip]

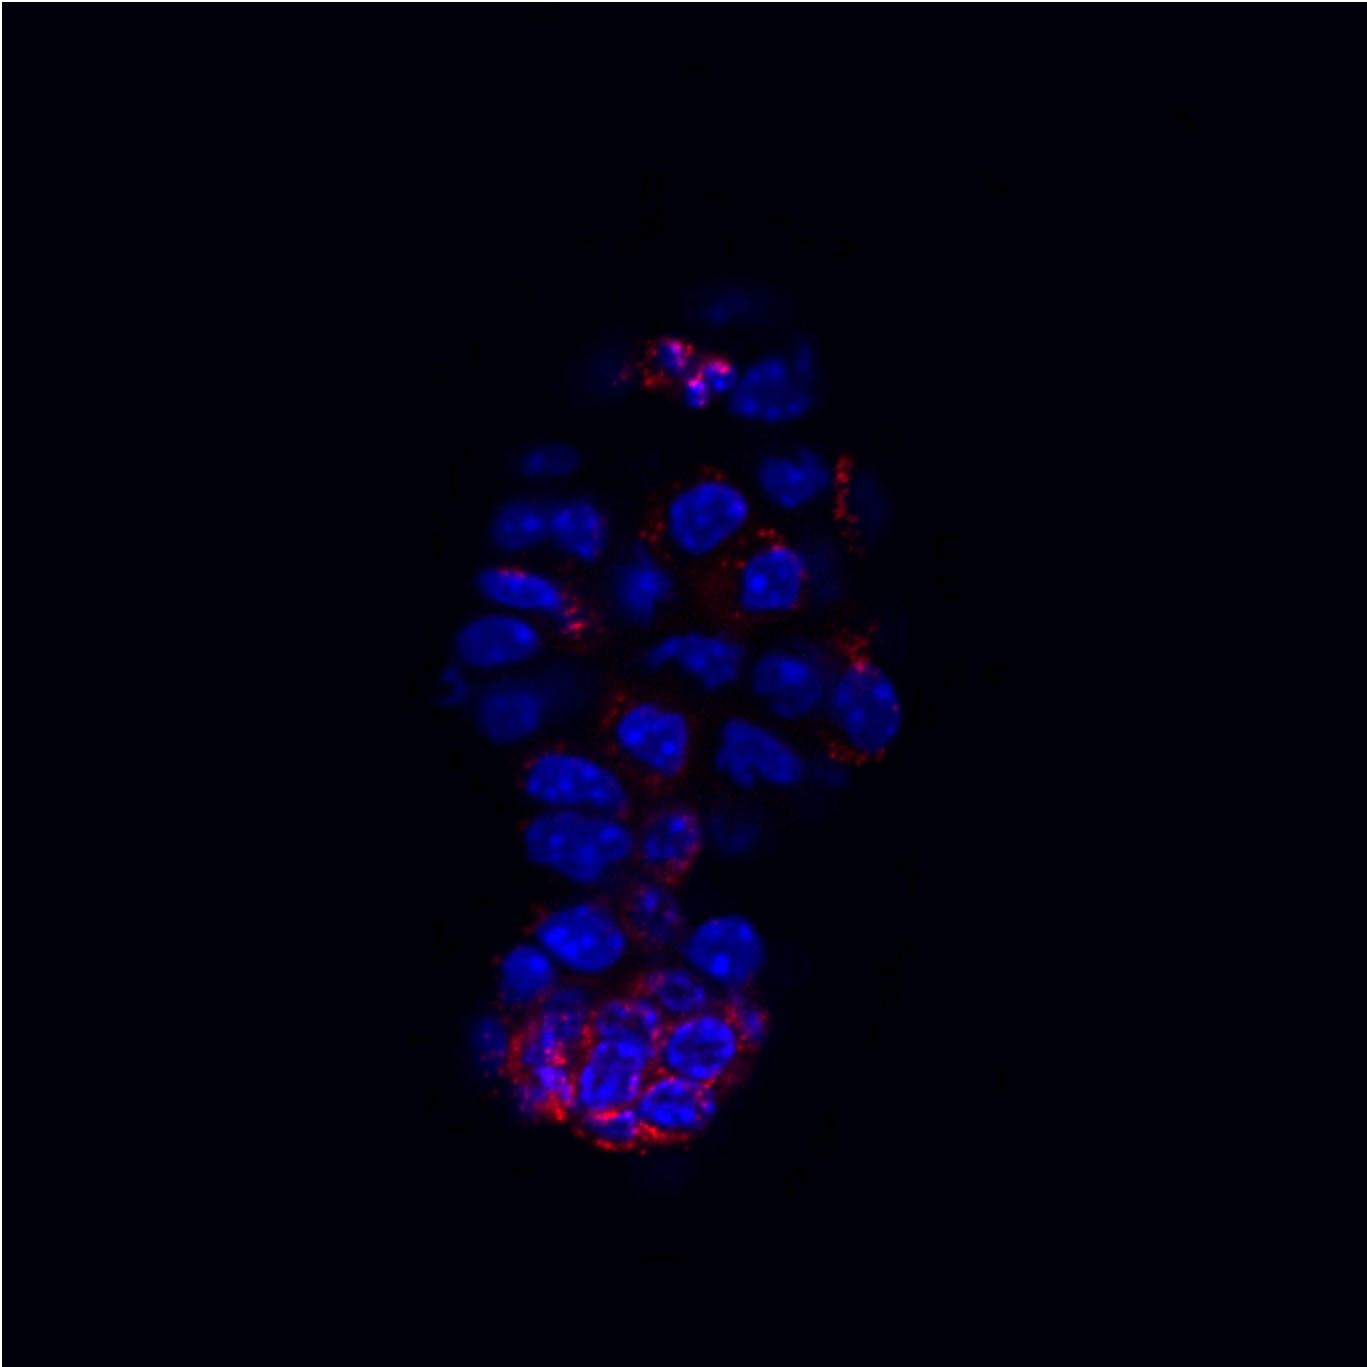

Supplement: Raw_data_or_figure_2.zip [file Raw_data_or_figure_2.zip]
